# Supplementary material for: Presence of Infected Gr-1intCD11bhiCD11cint Monocytic Myeloid Derived Suppressor Cells Subverts T Cell Response and Is Associated With Impaired Dendritic Cell Function in Mycobacterium avium-Infected Mice
Source: PubMed Central journal article supplement (PMC6198055; doi:10.3389/fimmu.2018.02317), 2018-10-16
Supplement: Data_Sheet_1.pdf [file Data_Sheet_1.pdf]

# Figures S1. Related to Figure 1 and 2.

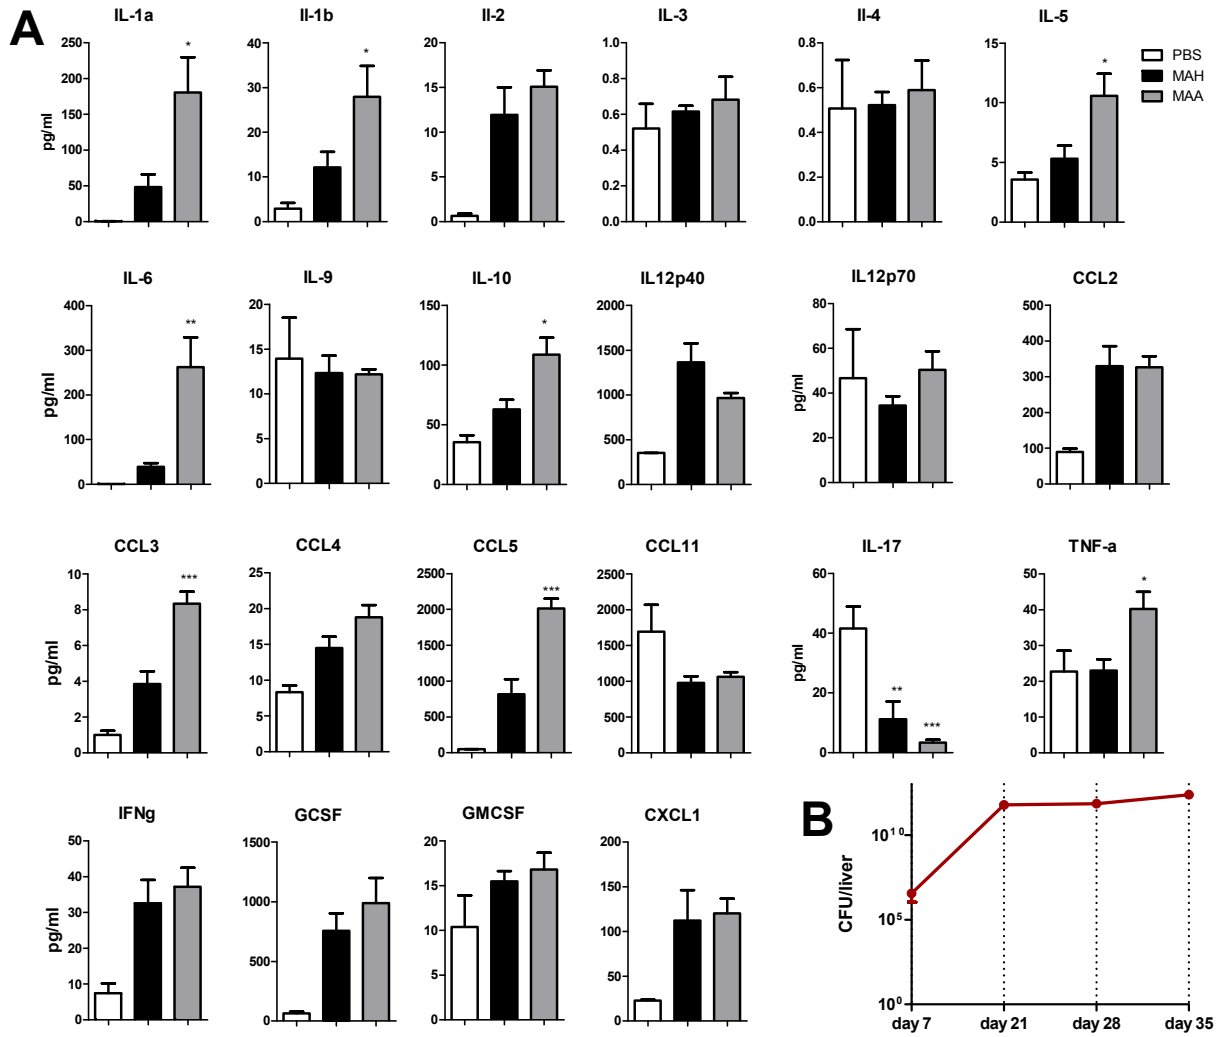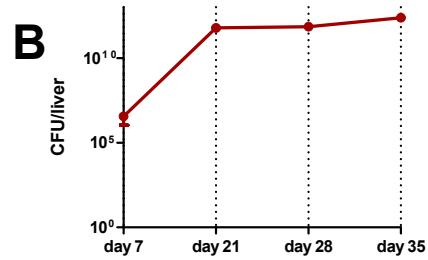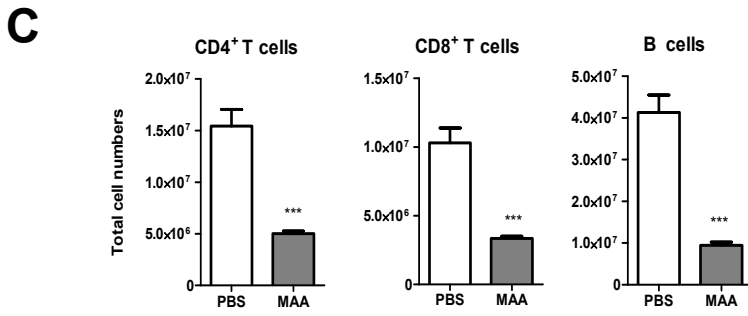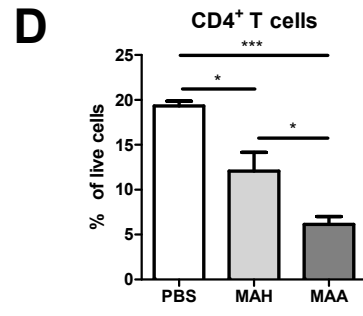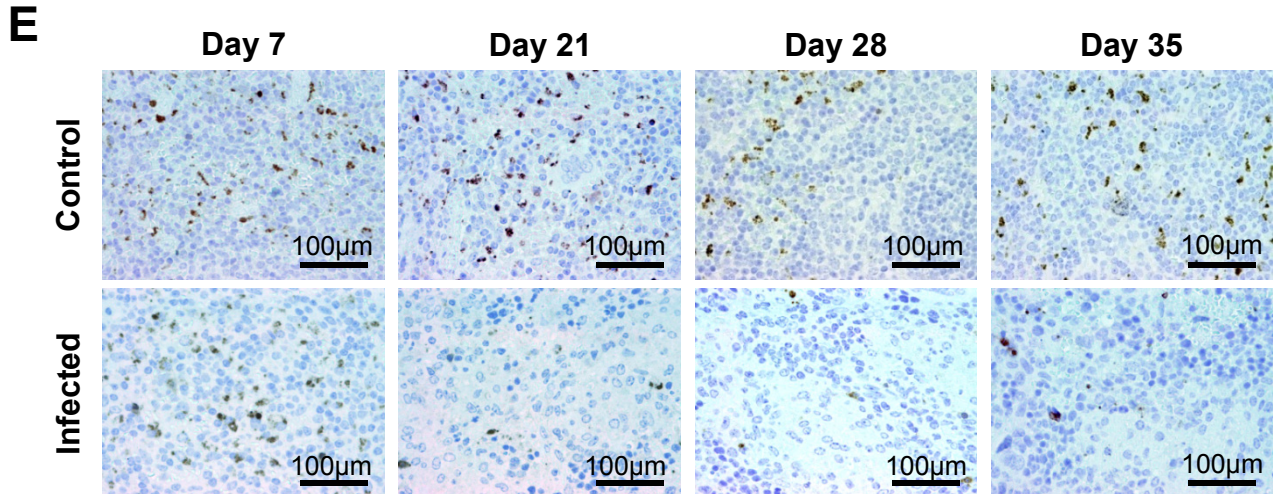

Figure S2 Related to Figure 2

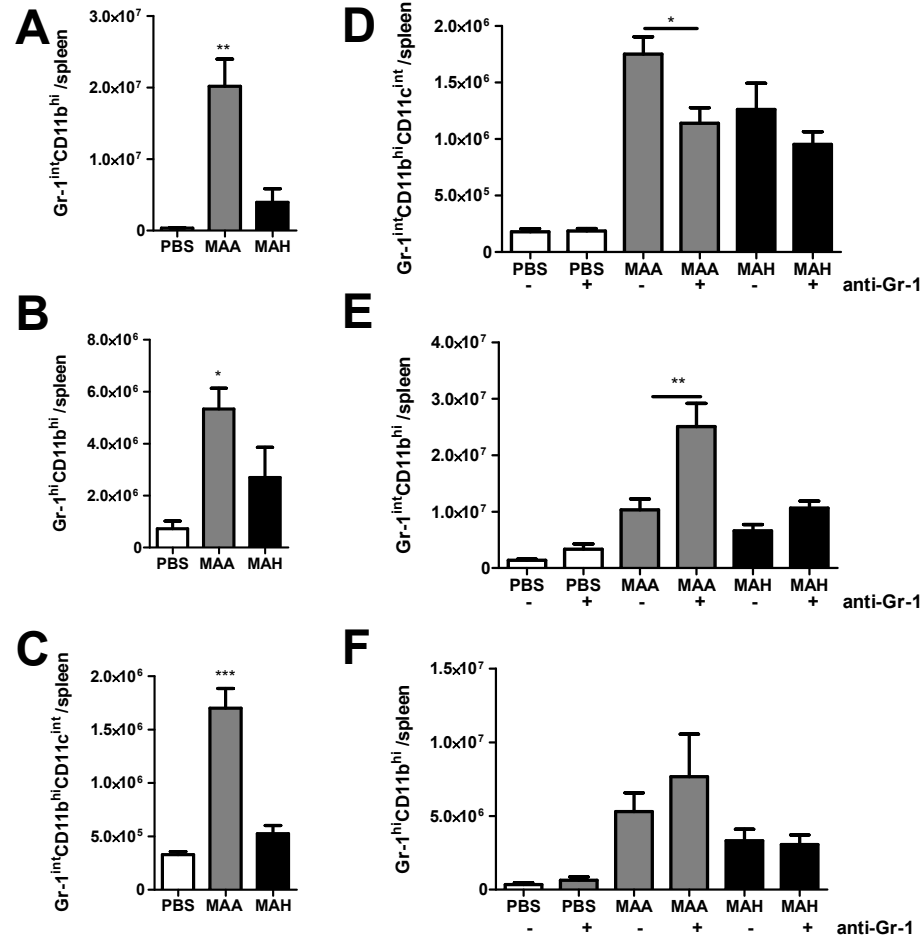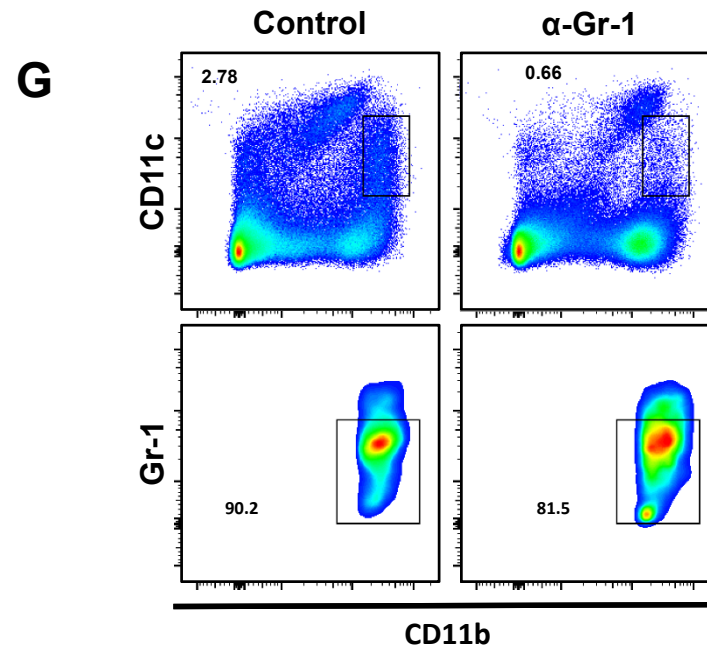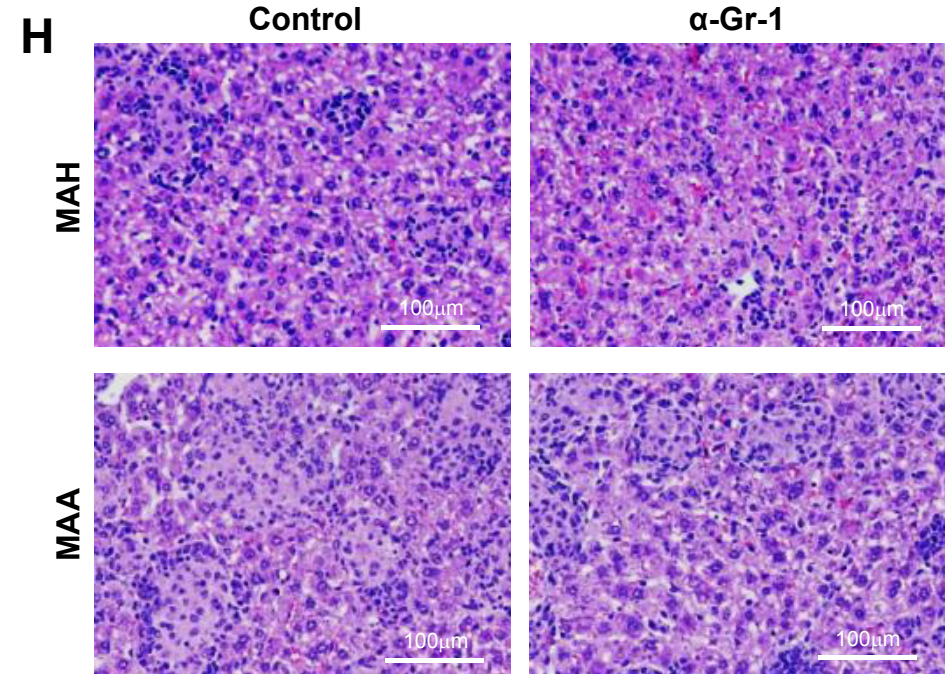

Figures S3. Related to Figure 6.

**A**

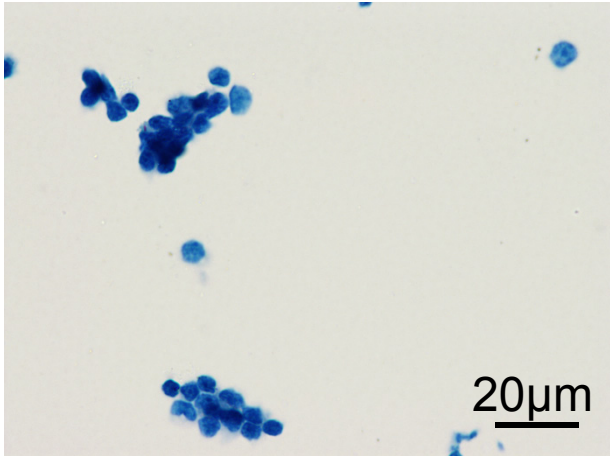

**B**

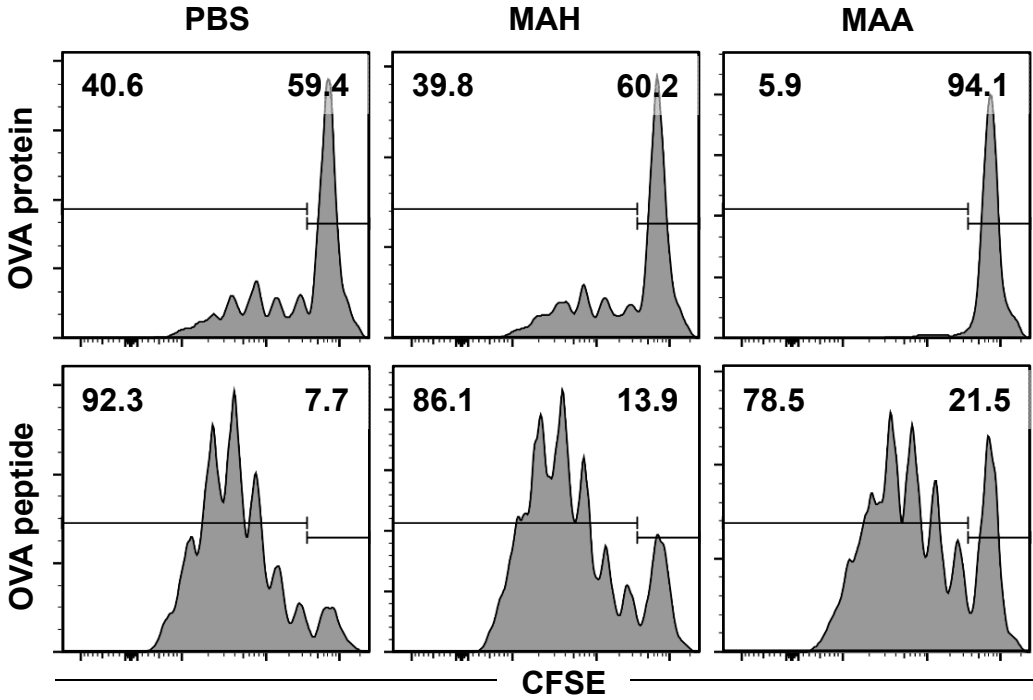

**C**

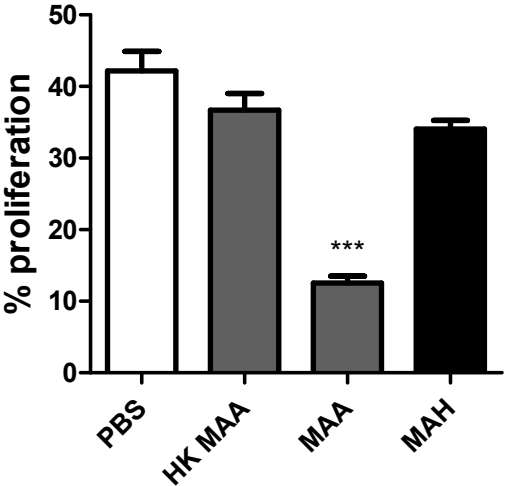

Figure S4. Related to Figure 6.

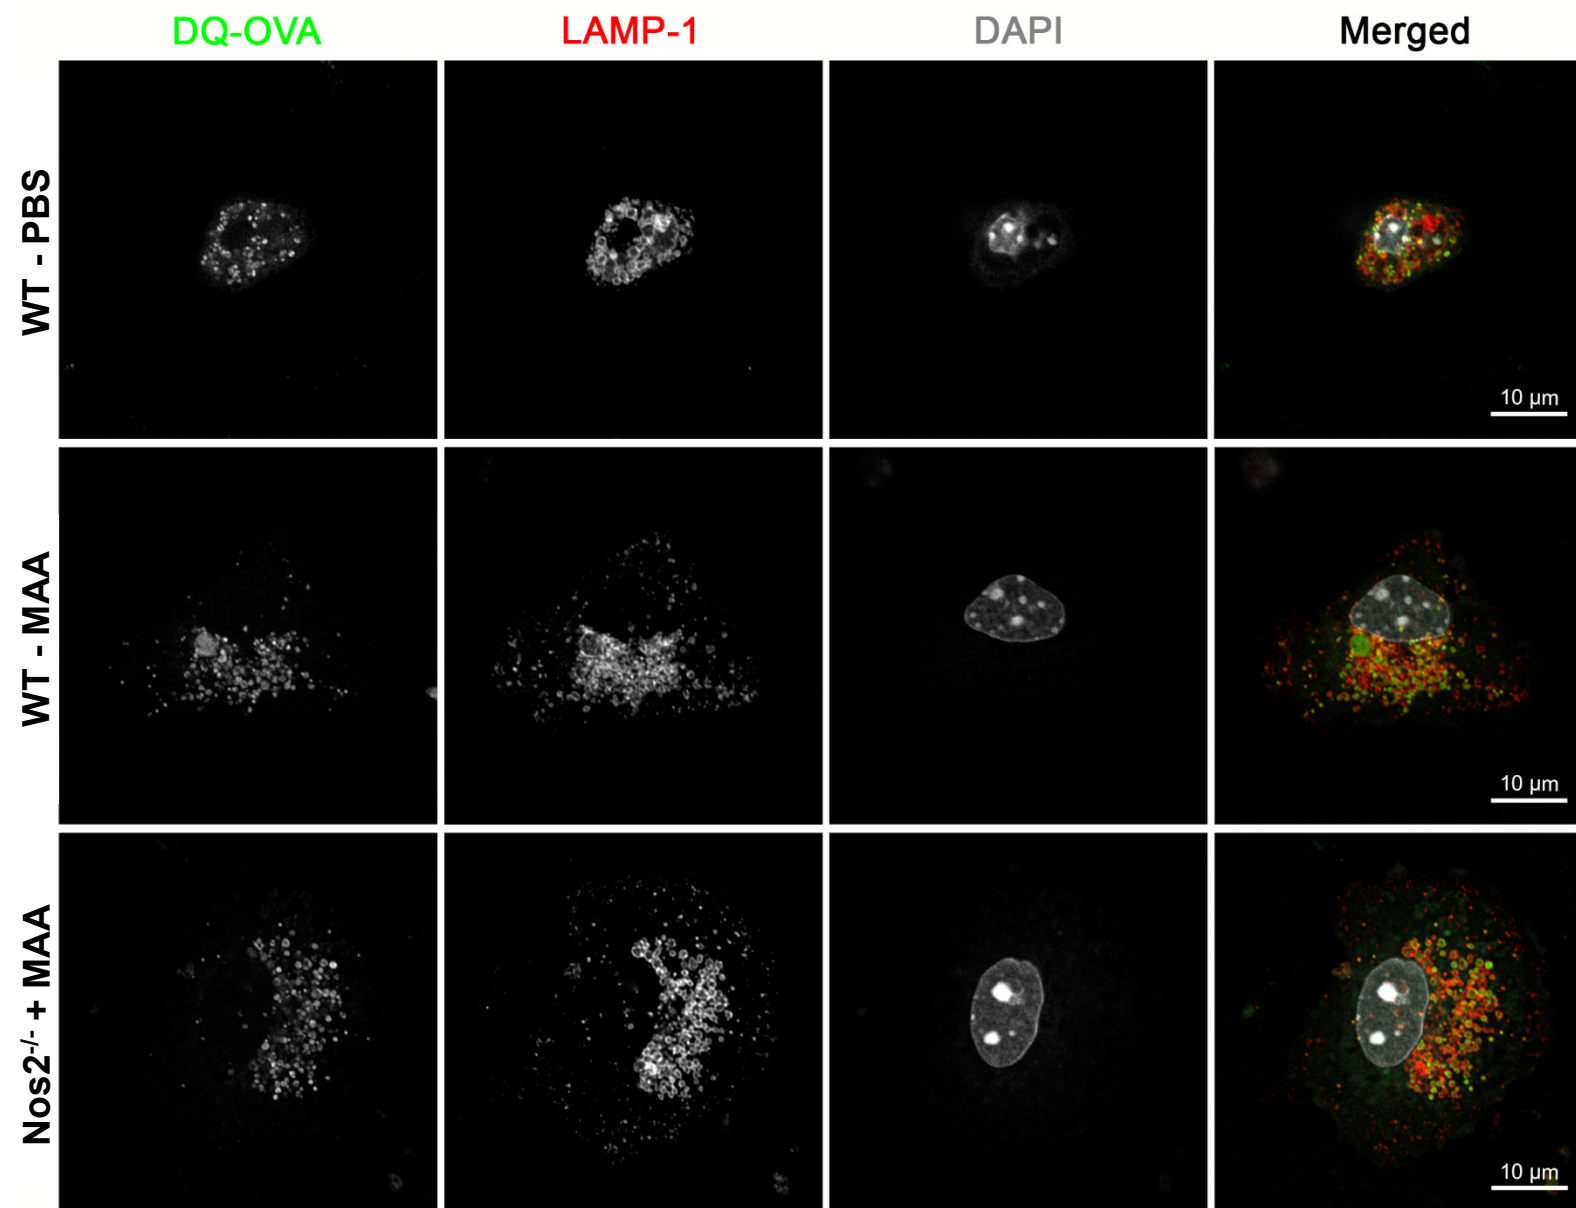

Figure S5

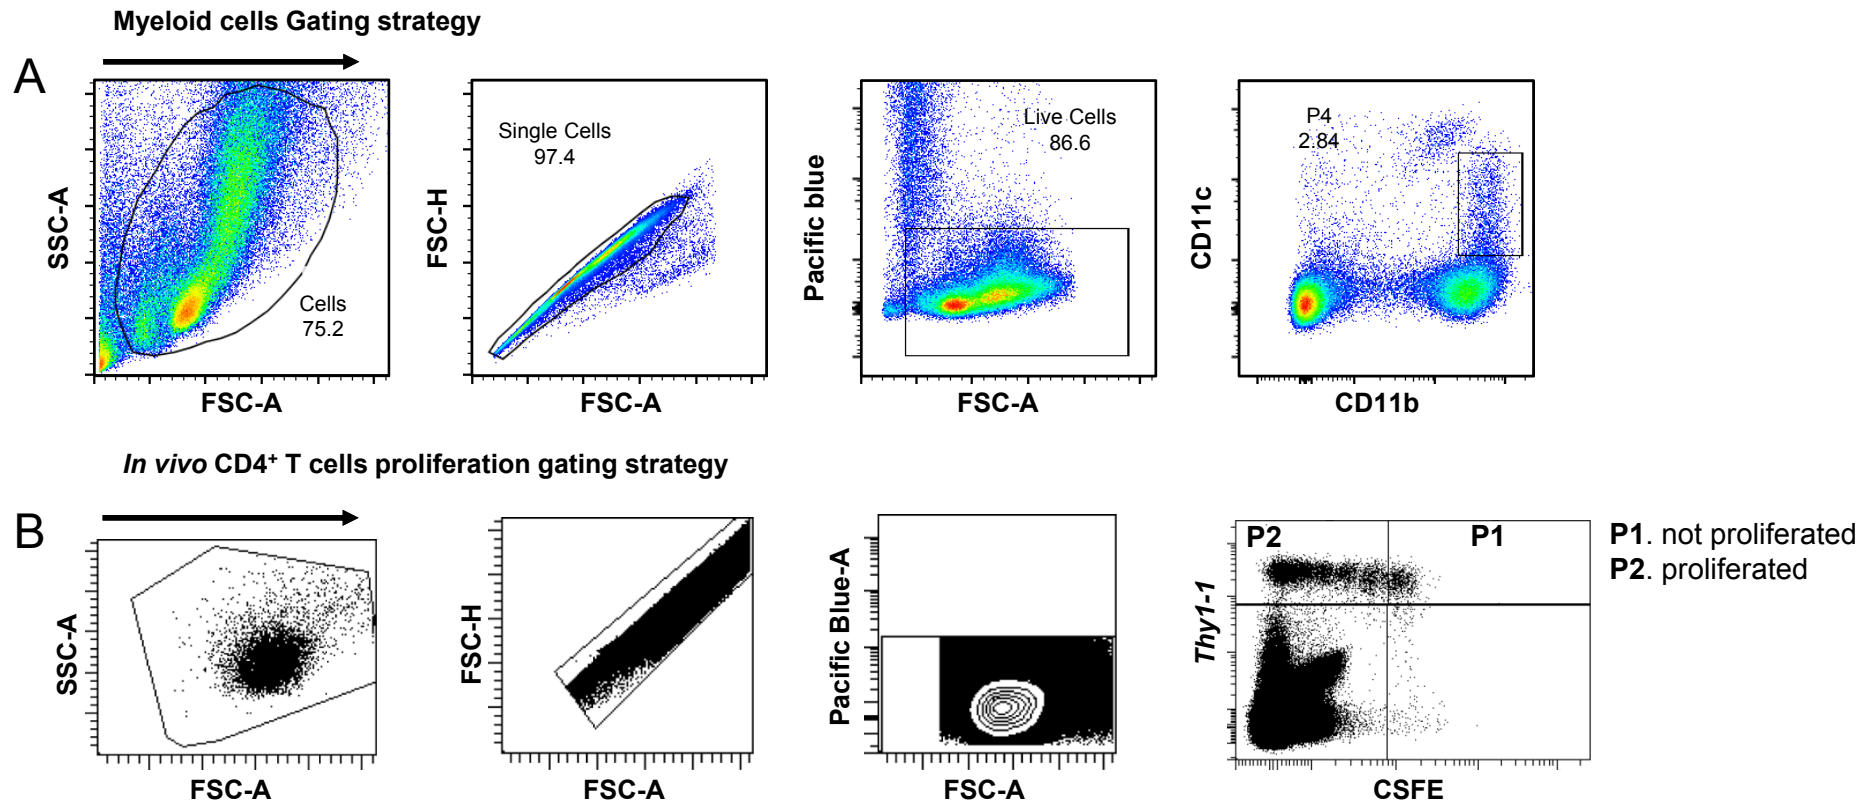

Table S1: List of antibodies for flow cytometry used in this study

| Antibody            | Antigen      | Clone       | Company       |
|---------------------|--------------|-------------|---------------|
| Anti-CD3            | CD3 mouse    | 17A2        | eBioscience   |
| Anti-CD4            | CD4 mouse    | RMA4.5      | eBioscience   |
| Anti-CD8            | CD8 mouse    | 53.6.7      | eBioscience   |
| Anti-CD11b          | CD11b mouse  | M1/70       | eBioscience   |
| Anti-CD11c          | CD11c mouse  | N418        | eBioscience   |
| Anti-CD25           | CD25 mouse   | PC61.5      | eBioscience   |
| Anti-CD 45RA        | CD45RA mouse | 3e-F11      | BioLegend     |
| Anti-CD 45RB        | CD45RB mouse | 16A         | eBioscience   |
| Anti-CD90.1(Thy1.1) | CD90.1 mouse | HIS51       | eBioscience   |
| Anti-Gr-1           | Gr-1 mouse   | RB6.8C5     | BD pharmingen |
| Anti-Ly6C           | Ly6C mouse   | AL-21       | BD pharmingen |
| Anti-Ly6G           | Ly6G mouse   | 1A8-Ly6g    | eBioscience   |
| Anti-FCR            | FCR mouse    | 2.4G2       | BD Pharmingen |
| Anti-PDL-1          | PDL-1 mouse  | MIH5        | eBioscience   |
| Anti-CD86           | CD86 mouse   | GL1         | eBioscience   |
| Anti-MHC-II         | MHC-II mouse | M5/114.15.2 | eBioscience   |
| Anti-CD19           | CD19 mouse   | 1D3         | BD pharmingen |
| Anti-Nos2           | Nos2 mouse   | CXFNT       | eBioscience   |
| Anti-TNF            | TNF mouse    | MP6-XT22    | eBioscience   |
| Anti-LAMP1          | Mouse LAMP1  | 1D4B        | Biolegend     |
